# Supplementary material for: Markerless Measurement and Evaluation of General Movements in Infants
Source: PubMed Central journal article supplement (PMC6989465; doi:10.1038/s41598-020-57580-z), 2020-01-29
Supplement: 41598_2020_57580_MOESM1_ESM.pdf [file 41598_2020_57580_MOESM1_ESM.pdf]

*Supplementary material*  
**Markerless Measurement and Evaluation of  
General Movements in Infants**

Toshio Tsuji<sup>1\*</sup>, Shota Nakashima<sup>1</sup>, Hideaki Hayashi<sup>2</sup>, Zu Soh<sup>1</sup>, Akira Furui<sup>1</sup>, Taro Shibasaki<sup>3</sup>, Keisuke Shima<sup>4</sup>,  
and Koji Shimatani<sup>5</sup>

1 Department of System Cybernetics, Graduate School of Engineering, Hiroshima University, 1-4-1 Kagamiyama, Higashi-Hiroshima,  
Hiroshima 739-8527, Japan

2 Faculty of Information Science and Electrical Engineering, Kyushu University, 744 Motoooka, Nishi-Ku, Fukuoka, Fukuoka 819-0395,  
Japan

3 College of Engineering, Ibaraki University, 4-12-1 Nakanarusawa, Hitachi, Ibaraki 316-8511, Japan

4 School of Engineering Science, Yokohama National University, 79-1 Tokiwadai, Hodogaya Ward, Yokohama, Kanagawa 240-8501,  
Japan

5 Department of Physical Therapy, Prefectural University of Hiroshima, 1-1 Gakuen, Mihara, Hiroshima 723-0053, Japan

**The PDF file includes:**

**Supplementary Table S1.** Subject information

**Supplementary Table S1.** Subject information. For subjects with multiple videos, the average video lengths (and standard deviations) are shown.

| Subject | Type of GMs | Gestational age (week) | Corrected age (week)    | Birth weight (g) | Gender | Number of videos | Video length (s) | Number of using analysis intervals | Place of recording |
|---------|-------------|------------------------|-------------------------|------------------|--------|------------------|------------------|------------------------------------|--------------------|
| A       | WMs, FMs    | -                      | 2–8 (WMs)<br>9–15 (FMs) | 3,175            | Male   | 9                | 640±346.6        | 37 (WMs)<br>155 (FMs)              | Home               |
| B       | WMs, FMs    | -                      | 3–8 (WMs)<br>8–15 (FMs) | 3,068            | Female | 6                | 125±35.1         | 11 (WMs)<br>14 (FMs)               | Home               |
| C       | WMs, FMs    | -                      | 2–7 (WMs)<br>8–15 (FMs) | 2,960            | Female | 14               | 357.9±227.4      | 57 (WMs)<br>110 (FMs)              | Home               |
| D       | WMs         | 37                     | -                       | 2,246            | Female | 1                | 540              | 9                                  | Hospital           |
| E       | WMs         | 29                     | -                       | 1,024            | Female | 1                | 600              | 14                                 | Hospital           |
| F       | WMs         | 32                     | -                       | 1,184            | Male   | 1                | 570              | 9                                  | Hospital           |
| G       | WMs         | 34                     | -                       | 1,648            | Male   | 1                | 600              | 18                                 | Hospital           |
| H       | WMs         | 35                     | -                       | 2,240            | Male   | 1                | 510              | 7                                  | Hospital           |
| I       | WMs         | 35                     | -                       | 2,184            | Female | 1                | 1,170            | 17                                 | Hospital           |
| J       | PR          | -                      | -                       | -                | -      | 1                | 480              | 15                                 | Hospital           |
| K       | PR          | -                      | -                       | -                | -      | 1                | 600              | 20                                 | Hospital           |
| L       | PR          | -                      | -                       | -                | -      | 1                | 660              | 22                                 | Hospital           |
| M       | WMs         | -                      | -                       | -                | -      | 1                | 420              | 14                                 | Hospital           |
| N       | PR          | -                      | -                       | -                | -      | 1                | 570              | 7                                  | Hospital           |
| O       | PR          | -                      | -                       | -                | -      | 1                | 540              | 10                                 | Hospital           |
| P       | PR          | -                      | -                       | -                | -      | 1                | 510              | 13                                 | Hospital           |
| Q       | FMs         | -                      | -                       | -                | -      | 1                | 450              | 12                                 | Hospital           |
| R       | PR          | -                      | -                       | -                | -      | 1                | 540              | 18                                 | Hospital           |
| S       | PR          | -                      | -                       | -                | -      | 1                | 390              | 4                                  | Hospital           |
| T       | CS          | 28                     | -                       | 1,200            | Male   | 1                | 60               | 31 <sup>†</sup>                    | Hospital           |
| U       | PR          | 25                     | -                       | 860              | Female | 1                | 60               | 31 <sup>†</sup>                    | Hospital           |

<sup>†</sup> The overlapped interval was used for subject T and subject U because their videos were shorter than those of the other
